# Supplementary material for: Predictive value of hematological markers of systemic inflammation for managing cervical cancer
Source: PubMed Central journal article supplement (PMC5546522; doi:10.18632/oncotarget.14827), 2017-01-26
Supplement: oncotarget-08-44824-s001.pdf [file oncotarget-08-44824-s001.pdf]

## Predictive value of hematological markers of systemic inflammation for managing cervical cancer

### Supplemental data

#### A

Table. Changes of NLR and PLR after surgical treatment in patients with pretreatment levels of  $\text{NLR} \geq 2.27$  or  $\text{PLR} \geq 148.9$ .

|            | pre-operation     | *post-operation   | <i>P</i> value |
|------------|-------------------|-------------------|----------------|
| NLR (n=68) | 2.92 (2.55-3.73)  | 2.30 (1.78-3.09)  | <0.0001        |
| PLR (n=75) | 169 (155.5-194.4) | 167.1 (121.9-238) | 0.4126         |

There is a significant decrease in the median level of NLR after surgical operation, while not change in PLR. \*Post-operation was defined by one month after surgery plus a complete course postoperative adjuvant treatment.

**B**

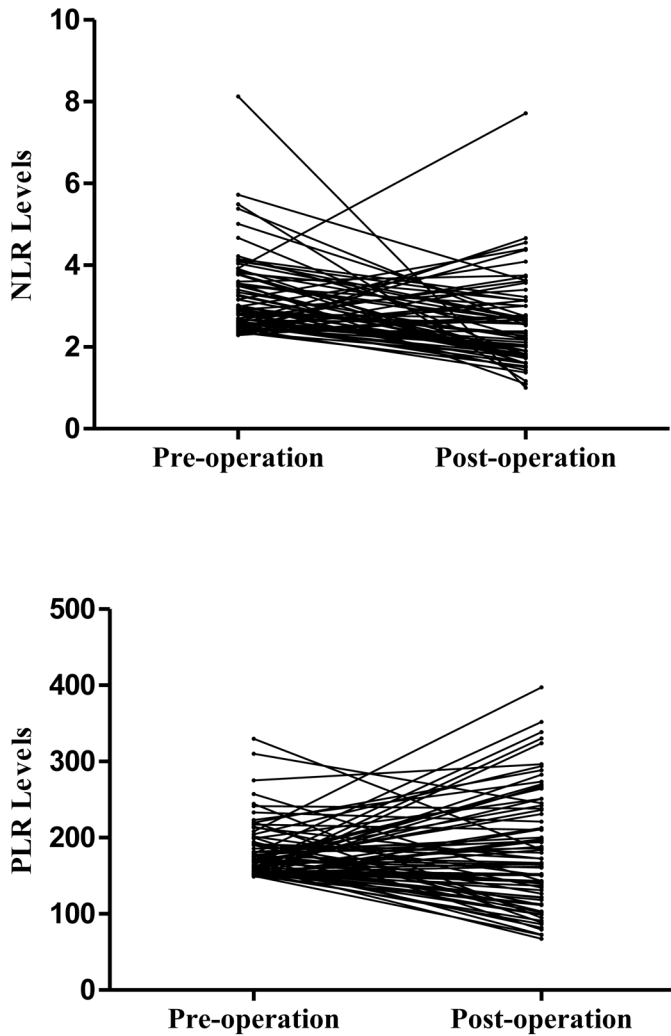

Figure. The changes of NLR and PLR before and after surgical operation.

Patients who had pretreatment levels of  $NLR \geq 2.27$  ( $n=68$ ) or  $PLR \geq 148.9$  ( $n=75$ ) were enrolled for the comparison. 17 of 68 patients showed an increase of NLR in post-operation, while the rest (51/68) manifested a decrease. The relative portion for PLR was 32 with increase and 43 with decrease.
